# Supplementary material for: Photoejection–recapture of the Ca2+ cation studied by time resolved spectroscopy and TDDFT calculations: the case study of an azacrown–iridium(iii) complex
Source: Royal Society of Chemistry journal article supplement (doi:10.1039/d4nj02274b), 2024-01-01

## SUPPORTING INFORMATION

# Photoejection-recapture of $\text{Ca}^{2+}$ Cation studied by time resolved spectroscopy and TDDFT calculations: the case study of Azacrown –Iridium (III) complex.

Clément Guerrin<sup>a</sup>, Laure De Thieulloy<sup>c</sup>, Julien Dubois<sup>a</sup>, Clément Barois<sup>b</sup>, Aurélie Perrier<sup>c,d</sup>, Isabelle Leray<sup>b</sup>, Cedric Mongin<sup>b,\*</sup>, Stephane Aloise<sup>a,\*</sup>

*a. Univ. Lille, CNRS, UMR 8516 - LASIRE- Laboratoire Avancé de Spectroscopie pour les Interactions la Réactivité et l'Environnement, F-59000 Lille, France*

*b. Université Paris-Saclay, ENS Paris-Saclay, CNRS, PPSM, 91190, Gif-sur-Yvette, France.*

*c. Chimie ParisTech, PSL Research University, CNRS, Institute of Chemistry for Life and Health Sciences (i-CLeHS), F-75005 Paris, France*

*d. Laboratoire Interdisciplinaire des Energies de Demain, Université Paris Cité, CNRS, LIED, UMR 8236, Paris France*

**Figure S1. Job Plot:** JOB plot obtained at 375 nm from the absorption spectra of **1** in CH<sub>3</sub>CN (28μM) upon successive addition of calcium perchlorate solution from 0 to 0.29 M. Fitting results indicates a molar ratio 1:1.

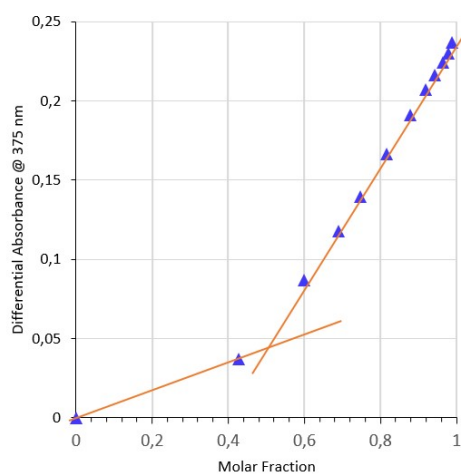

**Figure S2. Molecule 1:** Energies of the  $S_n$  and  $T_n$  states ( $n=1..6$ ) in eV at the  $S_0$  geometry. Selected spin-orbit coupling matrix elements  $\langle S_n | \hat{H}_{SO} | T_k \rangle$  are given ( $\text{cm}^{-1}$ ) ( $\langle S_1 | \hat{H}_{SO} | T_k \rangle$  in red,  $\langle S_2 | \hat{H}_{SO} | T_k \rangle$  in dark blue). The variation of the electronic density upon excitation for the transitions  $S_n \leftarrow S_0$  and  $T_n \leftarrow S_0$  is also provided along with the norm of the CT dipole moment (blue: loss of electronic density, red: gain of electronic density).

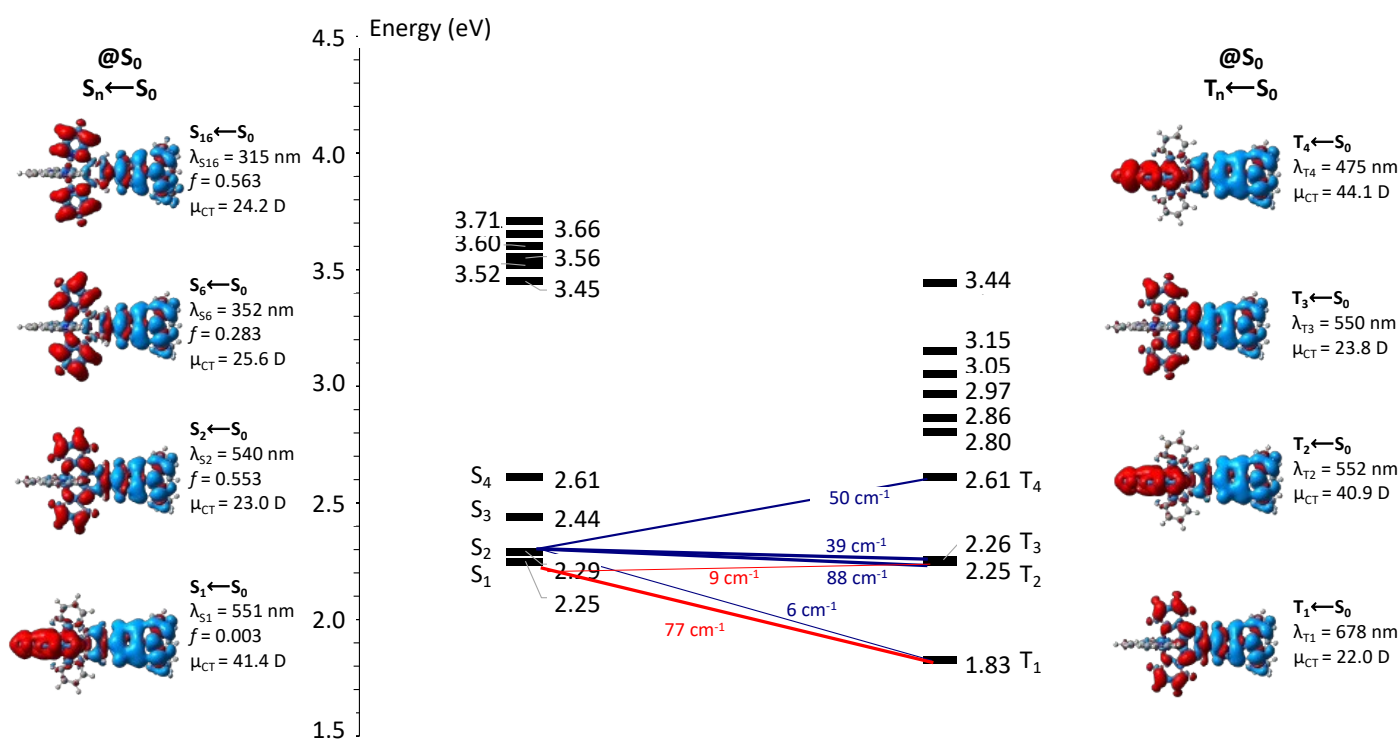

**Figure S3. Molecule 1-Ca<sup>2+</sup>:** Energies of the S<sub>n</sub> and T<sub>n</sub> states (n=1..6) in eV at the S<sub>0</sub> geometry. Selected spin-orbit coupling matrix elements  $\langle S_n | \hat{H}_{SO} | T_k \rangle$  are given (cm<sup>-1</sup>) ( $\langle S_1 | \hat{H}_{SO} | T_k \rangle$  in red,  $\langle S_2 | \hat{H}_{SO} | T_k \rangle$  in dark blue). The variation of the electronic density upon excitation for the transitions S<sub>n</sub> ← S<sub>0</sub> and T<sub>n</sub> ← S<sub>0</sub> is also provided along with the norm of the CT dipole moment (blue: loss of electronic density, red: gain of electronic density).

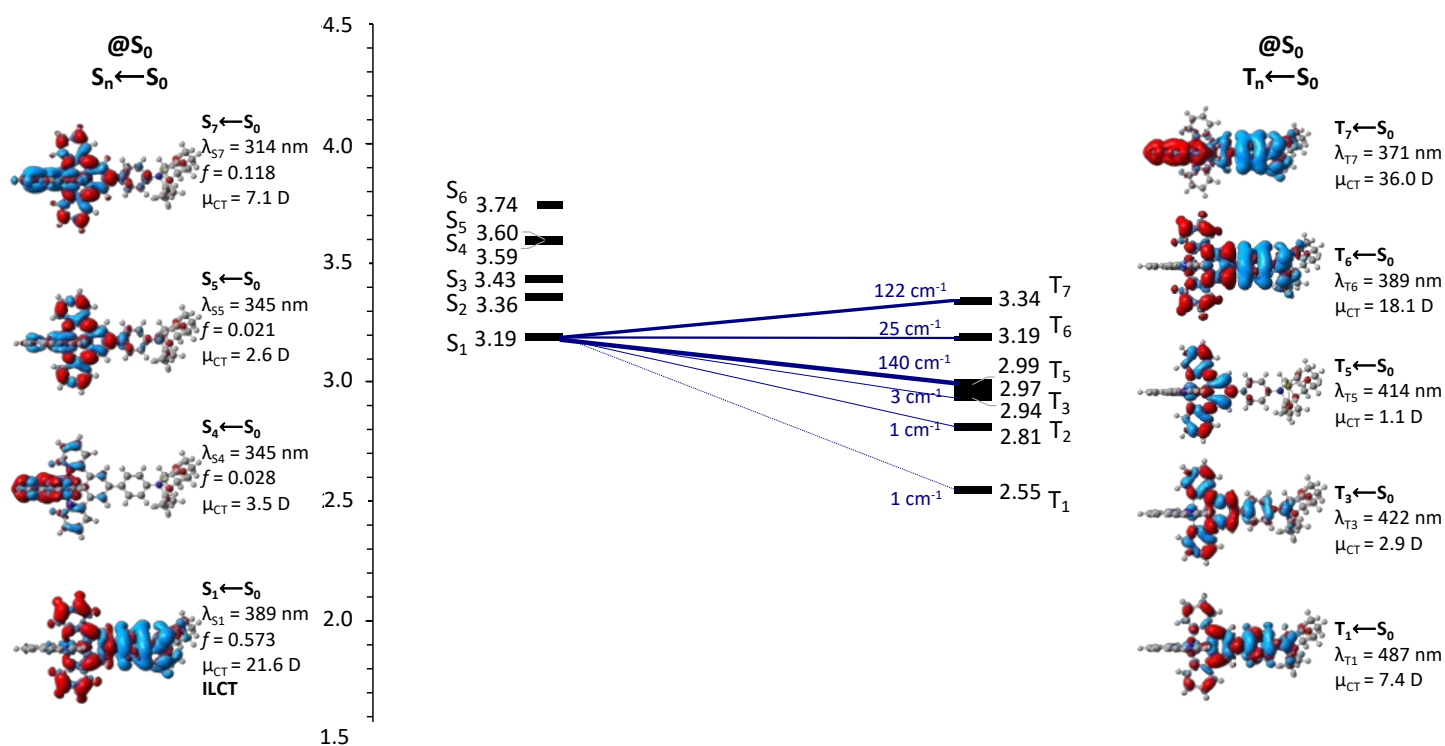

**Table S1: 1-Ca<sup>2+</sup> complex:** Main distances (in Å) of Ca<sup>2+</sup> inside the azacrown.  $\langle d_O \rangle$  is the average distance between Ca<sup>2+</sup> and the oxygens. The distances are defined in Figure S3.

|                    | d <sub>14</sub> | d <sub>15</sub> | d <sub>16</sub> | d <sub>17</sub> | d <sub>18</sub> | $\langle d_O \rangle$ |
|--------------------|-----------------|-----------------|-----------------|-----------------|-----------------|-----------------------|
| S <sub>0,opt</sub> | 2.764           | 2.399           | 2.458           | 2.449           | 2.396           | 2.425                 |
| S <sub>1,opt</sub> | 3.853           | 2.524           | 2.410           | 2.472           | 2.504           | 2.478                 |

**Figure S4:** Definition of the structural parameters and of the different regions used to calculate the variation of Natural Population Analysis (NPA) charges: I = phenyl-azacrown (blue); II = 2,2':6',2''-terpyridine (=tpy) (pink); III = tpy (purple)

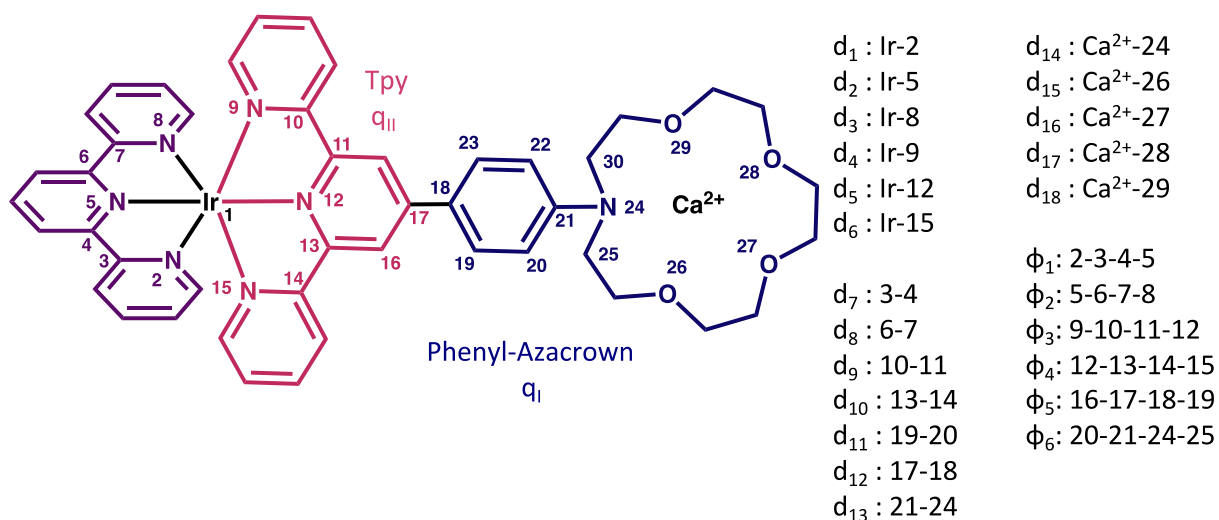

**Table S2. Molecule 1:** Absorption wavelengths (nm) calculated for the first 6 excited states with their corresponding oscillator strength (f), electronic excitation assignments and charge transfer parameters: D in Å, q in |e| and  $\mu_{CT}$  in D. The variations of NPA charges upon the corresponding excitation are also given according to the regions defined above.

| 1                    |           |       |                           |              |                 |                  |                 |            |       |
|----------------------|-----------|-------|---------------------------|--------------|-----------------|------------------|-----------------|------------|-------|
| State                | $\lambda$ | f     | Electronic excitation     | $\Delta q_I$ | $\Delta q_{II}$ | $\Delta q_{III}$ | $\Delta q_{Ir}$ | $\mu_{CT}$ | DCT   |
| $S_1 \leftarrow S_0$ | 551       | 0.002 | HOMO $\rightarrow$ LUMO   | -0.796       | 0.865           | -0.011           | 0.003           | 41.4       | 4.956 |
| $S_2 \leftarrow S_0$ | 540       | 0.552 | HOMO $\rightarrow$ LUMO+1 | -0.633       | 0.068           | 0.621            | 0.004           | 23.0       | 6.236 |
| $S_3 \leftarrow S_0$ | 507       | 0.000 | HOMO $\rightarrow$ LUMO+3 | -0.742       | 0.073           | 0.700            | -0.003          | 24.64      | 4.523 |
| $S_4 \leftarrow S_0$ | 475       | 0.000 | HOMO $\rightarrow$ LUMO+2 | -0.803       | 0.887           | -0.019           | -0.004          | 43.75      | 6.619 |
| $S_5 \leftarrow S_0$ | 359       | 0.000 | HOMO $\rightarrow$ LUMO+4 | -0.794       | 0.405           | 0.456            | -0.006          | 34.36      | 5.468 |
| $S_6 \leftarrow S_0$ | 352       | 0.283 | HOMO $\rightarrow$ LUMO+6 | -0.676       | 0.034           | 0.708            | -0.005          | 25.59      | 5.046 |

**Table S3. 1-Ca<sup>2+</sup> complex:** Absorption wavelengths (nm) calculated for the first 6 excited states with their corresponding oscillator strength (f), electronic excitation assignments and charge transfer parameters: D in Å, q in |e| and  $\mu_{CT}$  in D. The variations of "Natural Population Analysis" (NPA) charges upon the corresponding excitation are also given according to the regions defined above.

| 1 -Ca <sup>2+</sup>  |           |       |                             |              |                 |                  |                 |            |       |
|----------------------|-----------|-------|-----------------------------|--------------|-----------------|------------------|-----------------|------------|-------|
| State                | $\lambda$ | f     | Electronic excitation       | $\Delta q_I$ | $\Delta q_{II}$ | $\Delta q_{III}$ | $\Delta q_{Ir}$ | $\mu_{CT}$ | DCT   |
| $S_1 \leftarrow S_0$ | 389       | 0.573 | HOMO $\rightarrow$ LUMO     | -0.611       | -0.585          | -0.043           | -0.010          | 21.6       | 4.608 |
| $S_2 \leftarrow S_0$ | 369       | 0.000 | HOMO $\rightarrow$ LUMO+1   | -0.682       | 0.098           | -0.823           | -0.036          | 36.8       | 5.855 |
| $S_3 \leftarrow S_0$ | 361       | 0.001 | HOMO $\rightarrow$ LUMO+2   | -0.584       | 0.604           | 0.011            | -0.025          | 18.46      | 4.097 |
| $S_4 \leftarrow S_0$ | 345       | 0.028 | HOMO-1 $\rightarrow$ LUMO+1 | -0.010       | -0.143          | 0.272            | -0.118          | 3.49       | 1.123 |
| $S_5 \leftarrow S_0$ | 345       | 0.020 | HOMO-1 $\rightarrow$ LUMO   | -0.036       | 0.327           | -0.172           | -0.118          | 2.56       | 0.807 |
| $S_6 \leftarrow S_0$ | 331       | 0.000 | HOMO $\rightarrow$ LUMO+3   | -0.717       | -0.105          | 0.861            | -0.033          | 40.46      | 6.291 |

**Figure S5. 1-Ca<sup>2+</sup> complex:** Variation of the electronic density upon excitation for the transitions S<sub>n</sub> ← S<sub>0</sub> (n=1 to 15)

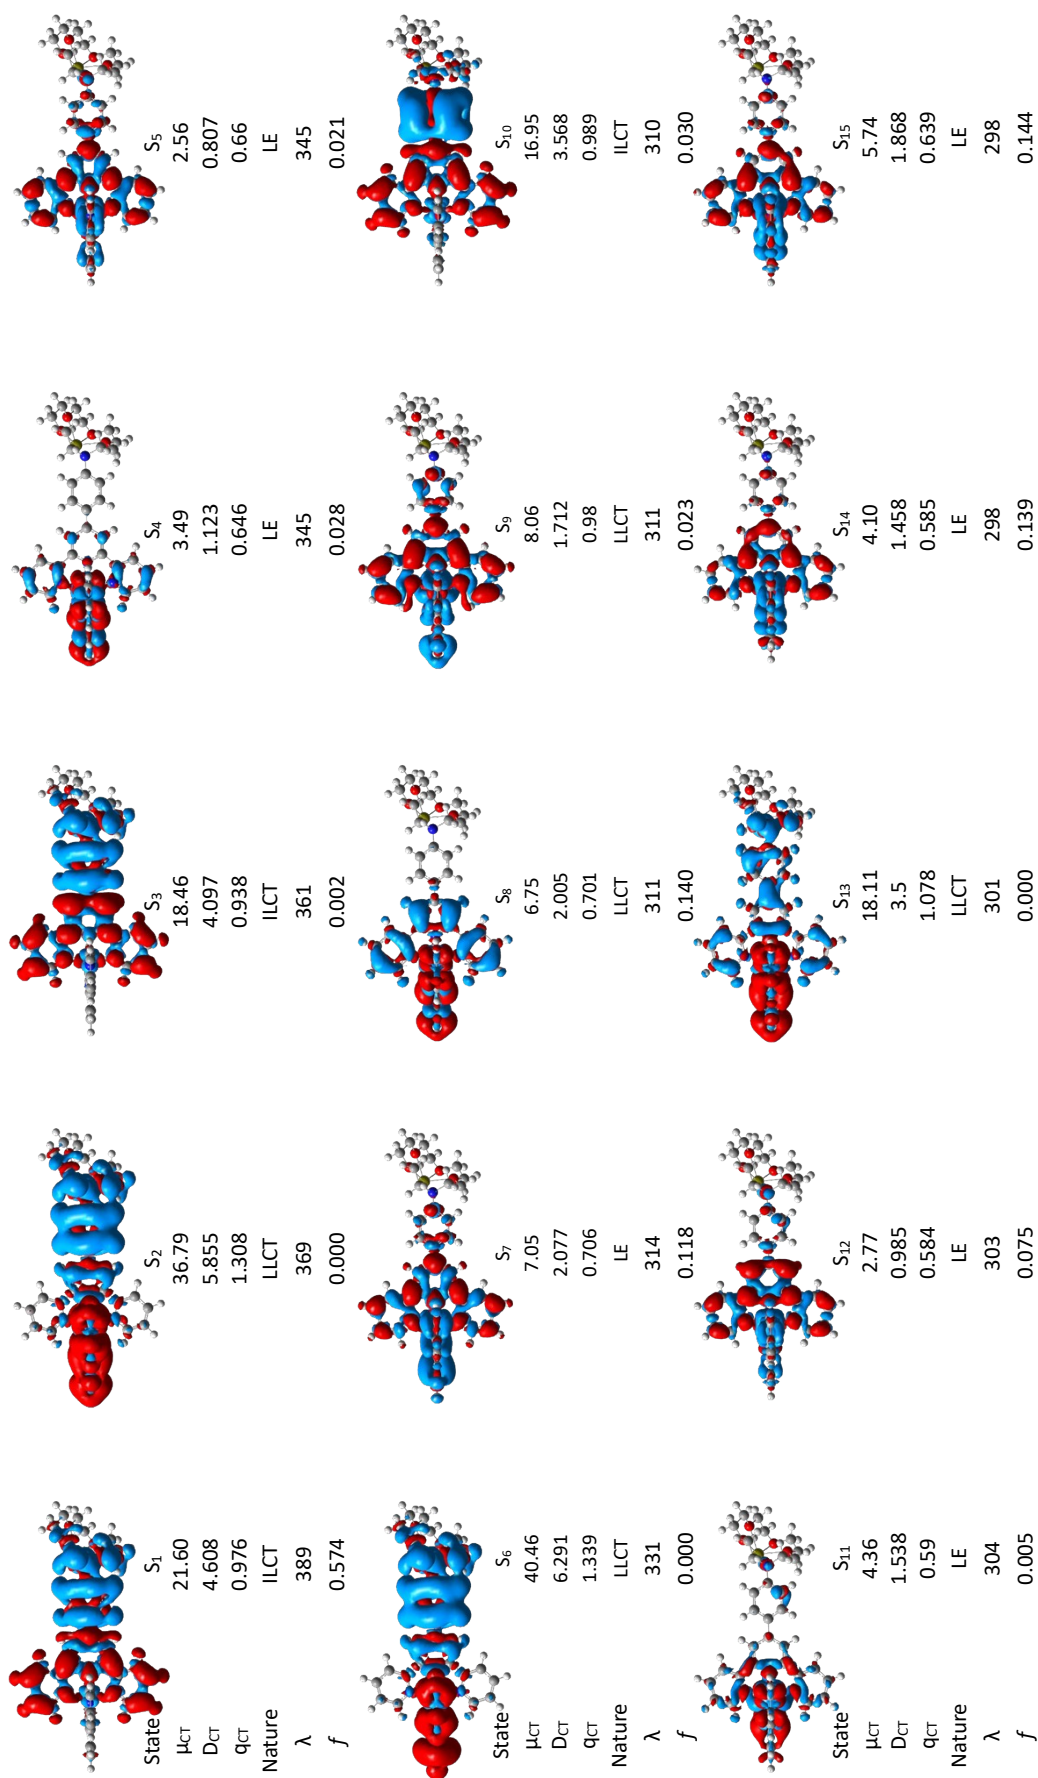

Figure S6  $^1\text{H}$  NMR spectrum of compound **4** ( $\text{CDCl}_3$ , 400 MHz)

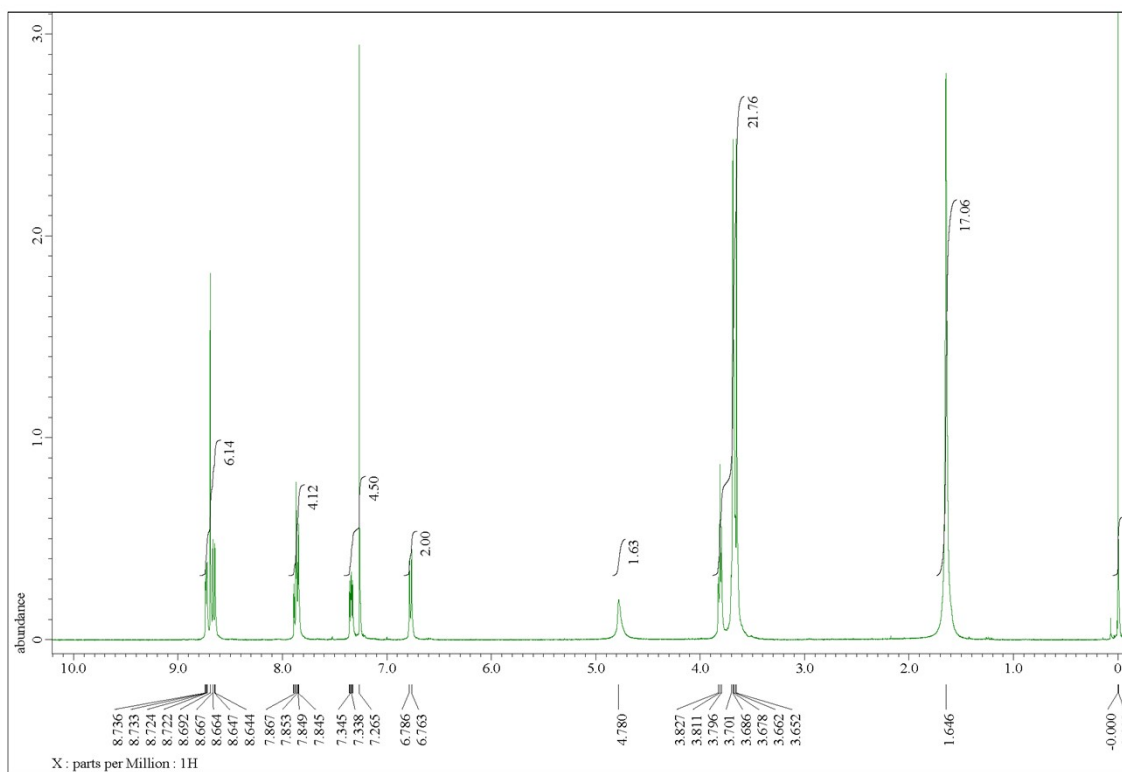

Figure S7  $^{13}\text{C}$  NMR spectrum of compound **4** ( $\text{CDCl}_3$ , 100 MHz)

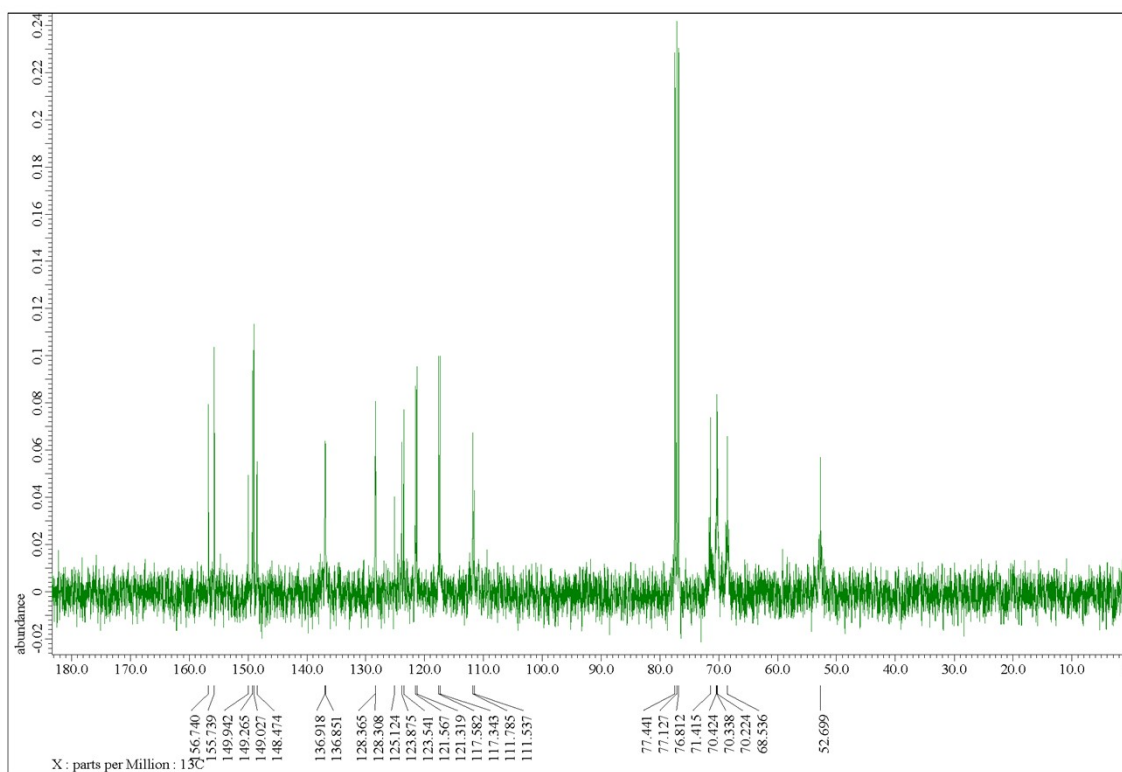



Figure S8  $^1\text{H}$  NMR spectrum of compound 5 (DMSO- $d_6$ , 80 °C, 400 MHz)

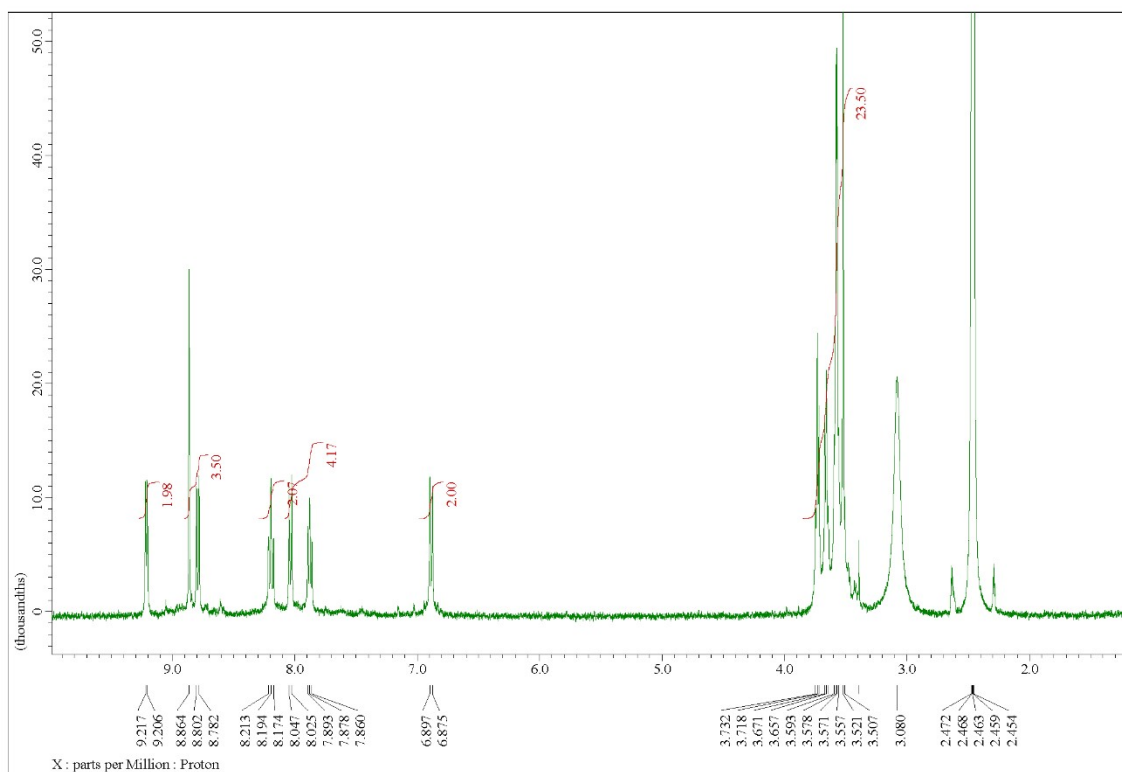

Figure S9  $^{13}\text{C}$  NMR spectrum of compound 5 (DMSO- $d_6$ , 80 °C, 100 MHz)

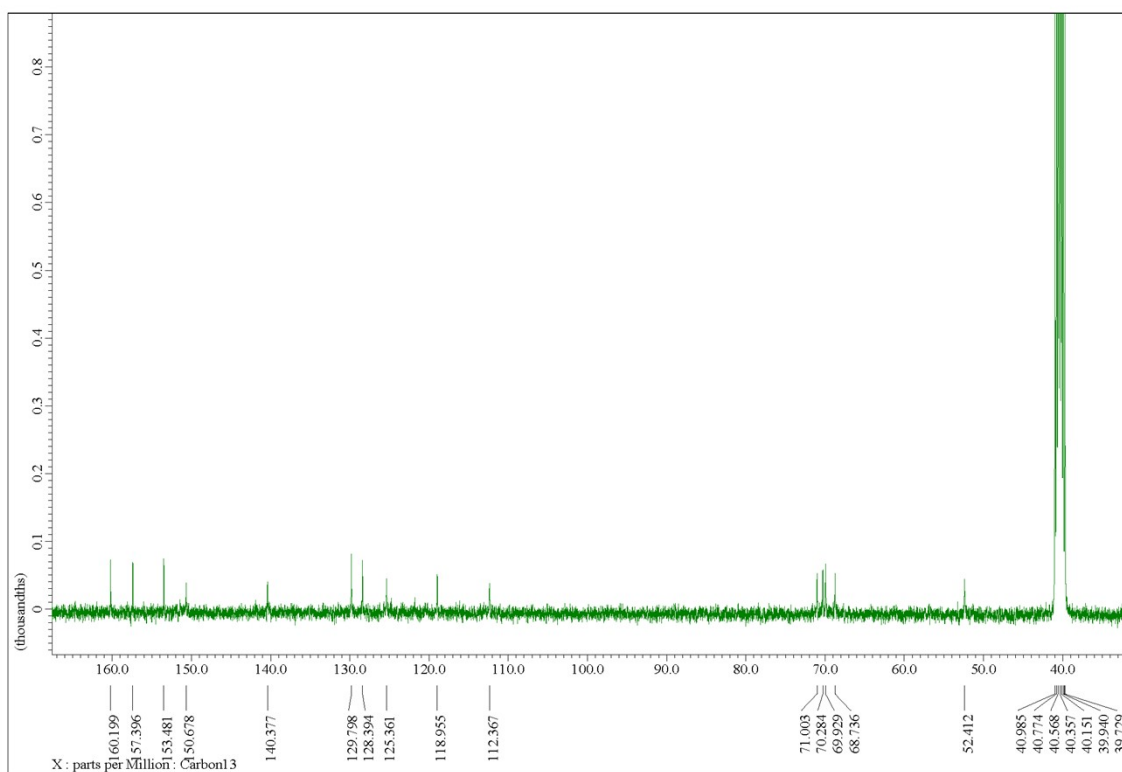

Figure S10 <sup>1</sup>H NMR spectrum of compound **1** (Acetone-d<sub>6</sub>, 400 MHz)

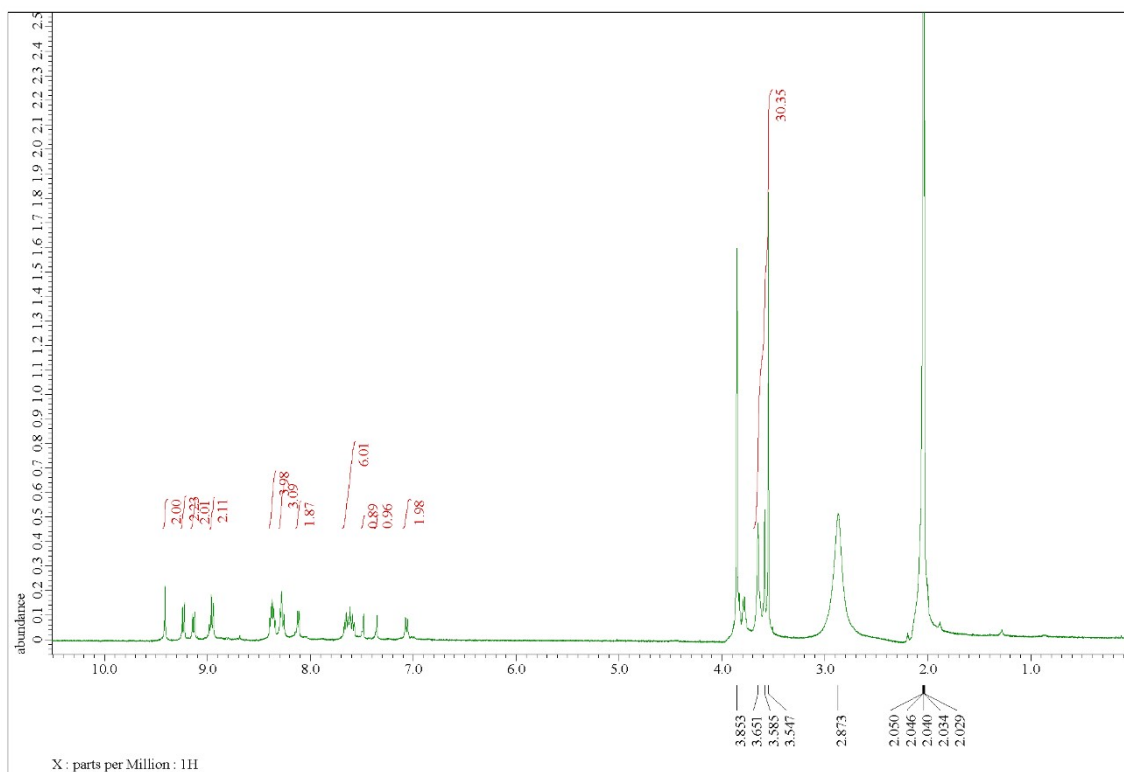

Supplement: d4nj02274b1.pdf [file d4nj02274b1.pdf]
